# Supplementary material
Source: publisher site journal article supplement (https://www.dovepress.com/get_supplementary_file.php?f=495663.docx)
Supplement: Supplementary file 1 [file get_supplementary_file.php]

**Supplementary Material**

Table S1. The search queries. The search queries were used on May 8th, 2024 in the Web of Science Core Collection database.

| **No** | **Query** | **Result** |
| --- | --- | --- |
| 1 | **TS=(“machine learning”) OR TS=(“artificial intelligence”) OR TS=(“deep learning”) OR TS=(“artificial neural network*”) OR TS=("computational intelligence") OR TS=(“deep neural network*”)** | 518,100 |
| 2 | **(TS=(“traditional chinese medicine*”) NOT TS=("university of traditional chinese medicine”)) OR (TS=(“chinese medicine*”) NOT TS=("university of chinese medicine”)) OR TS=(“chinese traditional medicine*”) OR TS=("chinese herbal medicine*")** | 49,874 |
| 3 | **#2 AND #1** | 580 |
| 4 | **#2 AND #1** and **2024** (Exclude – Publication Years) and **2024** (Exclude – Final Publication Year) | 525 |
| 5 | **#2 AND #1** and **2024** (Exclude – Publication Years) and **2024** (Exclude – Final Publication Year) and **Early Access** or **Proceeding Paper** or **Editorial Material** or **Retracted Publication** or **Meeting Abstract** or **Correction** or **Letter** (Exclude – Document Types) | 502 |

Table S2. Co-cited references analysis.

| **Author** | **Year** | **Journal** | **Cluster** | **Research Title** | **Citations** |
| --- | --- | --- | --- | --- | --- |
| Cortes C1 | 1995 | Machine Learning | Red | Support-Vector Networks | 20 |
| Cheung F2 | 2011 | Nature | Red | TCM: Made in China | 15 |
| Chen CYC3 | 2011 | PLOS ONE | Red | TCM Database@Taiwan: The World's Largest Traditional Chinese Medicine Database for Drug Screening In Silico | 19 |
| Breiman L.4 | 2001 | Machine Learning | Red | Random Forests | 17 |
| Wu Y5 | 2019 | Nucleic Acids Research | Red | SymMap: an integrative database of traditional Chinese medicine enhanced by symptom mapping | 15 |
| Ru JL6 | 2014 | Journal of Cheminformatics | Red | TCMSP: a database of systems pharmacology for drug discovery from herbal medicines | 21 |
| Krizhevsky Alex7 | 2017 | Communications of the ACM | Green | ImageNet classification with deep convolutional neural networks | 17 |
| He KM8 | 2016 | Proceedings of the IEEE Conference on Computer Vision and Pattern Recognition (CVPR) | Green | Deep Residual Learning for Image Recognition | 36 |
| Xu Q9 | 2020 | IEEE Journal of Biomedical and Health Informatics | Green | Multi-Task Joint Learning Model for Segmenting and Classifying Tongue Images Using a Deep Neural Network | 15 |
| Wang XZ10 | 2013 | IEEE Transactions on Image Processing | Green | Statistical Analysis of Tongue Images for Feature Extraction and Diagnostics | 16 |
| Wang X11 | 2020 | Computational and Structural Biotechnology Journal | Green | Artificial intelligence in tongue diagnosis: Using deep convolutional neural network for recognizing unhealthy tongue with tooth-mark | 18 |
| Simonyan K12 | 2015 | arXiv | Green | Very Deep Convolutional Networks for Large-Scale Image Recognition | 23 |
| Jiang M13 | 2012 | Journal of Ethnopharmacology | Blue | Syndrome differentiation in modern research of traditional Chinese medicine | 21 |
| Zhou XZ14 | 2010 | Artificial Intelligence in Medicine | Blue | Development of traditional Chinese medicine clinical data warehouse for medical knowledge discovery and decision support | 16 |
| Zhao CB15 | 2015 | Evidence-Based Complementary and Alternative Medicine | Blue | Advances in Patient Classification for Traditional Chinese Medicine: A Machine Learning Perspective | 15 |

**References**

1. Cortes C, Vapnik V. Support-vector networks. *Machine Learning 1995 20:3*. 1995;20(3):273-297. doi:10.1007/BF00994018

2. Cheung F. TCM: Made in China. *Nature 2011 480:7378*. 2011;480(7378):S82-S83. doi:10.1038/480s82a

3. Chen CYC. TCM Database@Taiwan: the world’s largest traditional Chinese medicine database for drug screening in silico. *PLoS One*. 2011;6(1). doi:10.1371/JOURNAL.PONE.0015939

4. Breiman L. Random forests. *Mach Learn*. 2001;45(1):5-32. doi:10.1023/A:1010933404324/METRICS

5. Wu Y, Zhang F, Yang K, et al. SymMap: an integrative database of traditional Chinese medicine enhanced by symptom mapping. *Nucleic Acids Res*. 2019;47(D1):D1110-D1117. doi:10.1093/NAR/GKY1021

6. Ru J, Li P, Wang J, et al. TCMSP: a database of systems pharmacology for drug discovery from herbal medicines. *J Cheminform*. 2014;6(1). doi:10.1186/1758-2946-6-13

7. Krizhevsky A, Sutskever I, Hinton GE. ImageNet classification with deep convolutional neural networks. *Commun ACM*. 2017;60(6):84-90. doi:10.1145/3065386

8. He K, Zhang X, Ren S, Sun J. Deep residual learning for image recognition. *Proceedings of the IEEE Computer Society Conference on Computer Vision and Pattern Recognition*. 2016;2016-December:770-778. doi:10.1109/CVPR.2016.90

9. Xu Q, Zeng Y, Tang W, et al. Multi-Task Joint Learning Model for Segmenting and Classifying Tongue Images Using a Deep Neural Network. *IEEE J Biomed Health Inform*. 2020;24(9):2481-2489. doi:10.1109/JBHI.2020.2986376

10. Wang X, Zhang B, Yang Z, Wang H, Zhang D. Statistical analysis of tongue images for feature extraction and diagnostics. *IEEE Trans Image Process*. 2013;22(12):5336-5347. doi:10.1109/TIP.2013.2284070

11. Wang X, Liu J, Wu C, et al. Artificial intelligence in tongue diagnosis: Using deep convolutional neural network for recognizing unhealthy tongue with tooth-mark. *Comput Struct Biotechnol J*. 2020;18:973. doi:10.1016/J.CSBJ.2020.04.002

12. Simonyan K, Zisserman A. Very Deep Convolutional Networks for Large-Scale Image Recognition. *3rd International Conference on Learning Representations, ICLR 2015 - Conference Track Proceedings*. Published online September 4, 2014. Accessed June 1, 2024. https://arxiv.org/abs/1409.1556v6

13. Jiang M, Lu C, Zhang C, et al. Syndrome differentiation in modern research of traditional Chinese medicine. *J Ethnopharmacol*. 2012;140(3):634-642. doi:10.1016/J.JEP.2012.01.033

14. Zhou X, Chen S, Liu B, et al. Development of traditional Chinese medicine clinical data warehouse for medical knowledge discovery and decision support. *Artif Intell Med*. 2010;48(2-3):139-152. doi:10.1016/J.ARTMED.2009.07.012

15. Zhao C, Li GZ, Wang C, Niu J. Advances in Patient Classification for Traditional Chinese Medicine: A Machine Learning Perspective. *Evid Based Complement Alternat Med*. 2015;2015. doi:10.1155/2015/376716
